# Supplementary material
Source: PubMed Central journal article supplement (PMC2832485)
Supplement: supp_30_6_1446__1.pdf [file supp_30_6_1446__1.pdf]

## SUPPLEMENTAL MATERIAL

### Supplemental figure legends

Figure S1. (A) The levels of the truncated Dcp2 proteins. Wild-type cells (yRP840) expressing Dcp2 (1-300), Dcp2 (1-247), Dcp2 (102-300) or Dcp2 (102-247)-GFP from the plasmid pRP1892, pRP1893, pRP1904 or pRP1905 were used. pRP250 was used as a control vector (no GFP). Cells were cultured as described in the figure legend to Fig. 1C. Western blot analysis was performed as described in the figure legend to Fig. 1C. Arrowheads indicate GFP-tagged proteins. Asterisks indicate non-specific bands. (B) Localization of truncated Dcp2 proteins. The same strains as described in the figure legend to Fig. S1 were used. Imaging was performed as described in the figure legend to Fig. 1B. Bar, 5  $\mu$ m.

Figure S2. (A) Coomassie blue-stained SDS-PAGE of recombinant purified proteins used in *in vitro* decapping assays. Representative decapping time courses for (B) 50 nM GB1-Dcp1:Dcp2 (1-245), (C) 50 nM GB1-Dcp1:Dcp2 (1-245) with 500nM Edc3, (D) 50 nM GB1-Dcp1:Dcp2 (1-315), and (E) 50 nM GB1-Dcp1:Dcp2 (1-315) with 500nM Edc3.

Figure S3. (A) The *RPS28B* mRNA was analyzed in strains lacking C-terminal regions of the chromosomal *DCP2* gene (yRP2749, yRP2745, yRP2746, yRP2751, yRP2752 and yRP2753). Cells were grown in YP media containing 2% galactose to mid-log phase at 24°C. The mRNA level normalized to the *SCR1* RNA level relative to the normalized mRNA level in yRP2749 (full-length Dcp2 without tag) was indicated below each lane. The average and standard deviation of values obtained with three independent strains of each genotype are shown. (B) The protein levels of Dcp2 (1-300)-3HA and Dcp2 (1-247)-3HA. Cells of the strains yRP2745, yRP2746, yRP2752 and yRP2753 were grown in YP media containing 2% galactose to mid-log phase at 24°C. Anti-HA antibody and anti-Pgk1 antibody were used in Western blot to detect HA-tagged proteins and the endogenous Pgk1 proteins as a loading control. (C) Analysis of the *YRA1* pre-mRNA. The

same RNA samples as described in the figure legend to Fig. S3A were used. The *YRA1* pre-mRNA level normalized to the *SCR1* RNA level relative to the normalized pre-mRNA level in yRP2749 (full-length Dcp2 without tag) was indicated below each lane. (D) The *MFA2pG* mRNA was analyzed in the same strains as described in the figure legend to Fig. S3A. Cells were grown in YP media containing 2% galactose to mid-log phase at 24°C to express the *MFA2pG* mRNA from the *GAL* promoter. The ratio of the full-length mRNA (FL) to the decay intermediate (pG) relative to the ratio in yRP2749 (full-length Dcp2 without tag) was indicated below each lane. The average and standard deviation of values obtained with three independent strains of each genotype are shown. (E) Growth phenotype of strains lacking C-terminal regions of the chromosomal *DCP2* gene (yRP2749, yRP2745, yRP2746, yRP2751, yRP2752 and yRP2753) was analyzed by serial dilution spotting. Cells were incubated on YP media containing 2% glucose for 2 days at 24°C.

Figure S4. (A) The *RPS28B* mRNA was analyzed in the strains yRP2793 (*dcp2Δ*) and yRP2794 (*dcp2Δ edc3Δ*) expressing the full-length or truncated Dcp2 protein from the plasmid pRP1207, pRP1453, pRP1450 or pRP1449. pRP10 was used as a control vector. The mRNA level normalized to the *SCR1* RNA level relative to the normalized mRNA level in yRP2793 (*dcp2Δ*) expressing full-length Dcp2 was indicated below each lane. The average and standard deviation of values obtained with three independent strains of each genotype are shown. (B) The *RPS28B* mRNA was analyzed in the strains yRP2793 (*dcp2Δ*) and yRP2794 (*dcp2Δ edc3Δ*) expressing Dcp2 (1-300)-GFP or Dcp2 (1-300) L255A K256A-GFP from a plasmid pRP1892 or pRP1896. The mRNA level normalized to the *SCR1* RNA level relative to the normalized mRNA level in yRP2793 (*dcp2Δ*) expressing wild-type Dcp2 was indicated below each lane.

Figure S5. (A) Growth phenotype of the same strains as described in the figure legend to Fig. S4A was analyzed by serial dilution spotting. Cells were incubated on SC media containing 2% glucose for 2 days at 30°C. (B) Analysis of the *MFA2pG* mRNA. The same RNA samples described as in the figure legend to Fig. S4A were used. The ratio of the full-length mRNA (FL) to the decay intermediate (pG) relative to the ratio in yRP2793

(*dcp2Δ*) expressing full-length Dcp2 was indicated below each lane.

Figure S6. (A) Growth phenotype of the same strains as described in the figure legend to Fig. S4B was analyzed by serial dilution spotting. Cells were incubated on SC media containing 2% glucose for 2 days at 30°C. (B) Analysis of the *MFA2pG* mRNA. The same RNA samples described as in the figure legend to Fig. S4B were used. The ratio of the full-length mRNA (FL) to the decay intermediate (pG) relative to the ratio in yRP2793 (*dcp2Δ*) expressing wild-type Dcp2 was indicated below each lane.

Figure S7. Deletion of the region 248-300 of Dcp2 shows a synthetic effect with the *dcp1-2* mutation. Cells of the strains yRP2745 (*DCP1 dcp2(Δ301-970)*), yRP2746 (*DCP1 dcp2(Δ248-970)*), yRP2747 (*dcp1-2 dcp2(Δ301-970)*) and yRP2748 (*dcp1-2 dcp2(Δ301-970)*) were grown in YP media containing 2% galactose to mid-log phase at 24°C, which is permissive for the *dcp1-2* temperature sensitive allele. The ratio of the full-length mRNA to the poly(G) decay intermediate in each strain relative to the ratio in the *DCP1 dcp2(Δ301-970)* strain is indicated. Three independent strains of each genotype were analyzed.

Table S1. Oligonucleotides used in this study

| Number  | Sequences                                                  | Description                                                                                                            | Sources    |
|---------|------------------------------------------------------------|------------------------------------------------------------------------------------------------------------------------|------------|
| oRP1440 | CGGGAGCTCTCGTCGTAAGGCTGACACTGCA                            | To create pRP1891, pRP1892, pR1893, pRP1896, pRP1903, pRP1904, pRP1905, pRP1906, pRP1907, pRP1908, pRP1909 and pRP1910 | This study |
| oRP1458 | CAGTCGCGATGTCTAATGCGAAGGTACTTTTATTTTTTTC<br>AGAT           | To create pRP1903                                                                                                      | This study |
| oRP1441 | GGGGATCCGCTTCCTATGCAAAATGCTTAATAATTCATTA<br>GACC           | To create pRP1891                                                                                                      | This study |
| oRP1442 | GGGGATCCGCTCTTGGCTCGAGGGTACCTGT                            | To create pRP1892, pRP1896, pRP1904, pRP1906, pRP1907, pRP1908, pRP1909 and pRP1910                                    | This study |
| oRP1443 | GGGGATCCGCAATTGATCTTCATTTTTTATTTGCCTCTGA<br>TGCTT          | To create pRP1893 and pRP1905                                                                                          | This study |
| oRP1459 | ACATCGCGAATGAATGAAGATCAATTGAAATCCTATGCG<br>GAA             | To create pRP1894                                                                                                      | This study |
| oRP1460 | ACATCGCGAATGCCTTCAATATTCCATCTCTTTCTGAAC<br>CG              | To create pRP1895                                                                                                      | This study |
| oRP1444 | CAGTCGCGACATATGTCACTGCCGCTACGACA                           | To create pRP1897 and pRP1898                                                                                          | This study |
| oRP1445 | CAGACGGGATCCTCATCACTCTTGGCTCGAGGGTACCTG<br>T               | To create pRP1897                                                                                                      | This study |
| oRP1446 | CAGACGGGATCCTCATCACAATTGATCTTCATTTTTTATT<br>TGCTTCTGATGCCT | To create pRP1898                                                                                                      | This study |
| oRP1447 | AATCCTATGCGGAAGAACAAGCGGCATTGTTGTTGGGTA<br>TCACTAA         | To create pRP1896                                                                                                      | This study |
| oRP1448 | TTAGTGATACCCAACAACAATGCCGCTTGTCTTCCGCAT<br>AGGATT          | To create pRP1896                                                                                                      | This study |
| oRP1465 | ATCAATTGAAATCCTATGCGGCAGAACAATTGAAATTGT<br>TGTT            | To create pRP1908                                                                                                      | This study |
| oRP1466 | AACAACAATTTCAATTGTTCTGCCGCATAGGATTTCAATT<br>GAT            | To create pRP1908                                                                                                      | This study |
| oRP1467 | TCACTAAGGAGGAGCAGATTGCTCCCGGTAGAGAGTTGC<br>TGAA            | To create pRP1909                                                                                                      | This study |

|         |                                                                    |                                                                                                 |            |
|---------|--------------------------------------------------------------------|-------------------------------------------------------------------------------------------------|------------|
| oRP1468 | TTCAGCAACTCTCTACCGGGAGCAATCTGCTCCTCCTTAG<br>TGA                    | To create pRP1909                                                                               | This study |
| oRP1469 | AGGAGCAGATTGATCCCGGTGCAGAGGCGCTGAATATGT<br>TACATACTGC              | To create pRP1906                                                                               | This study |
| oRP1470 | GCAGTATGTAACATATTCAGCGCCTCTGCACCGGGATCA<br>ATCTGCTCCT              | To create pRP1906                                                                               | This study |
| oRP1471 | GGAATTCGAGCTCCAAGATCTAGTGTATACGTTTTATAG<br>ACACACTGTAAATG          | To create pRP1454                                                                               | This study |
| oRP1472 | TGATATCGAATTCCTGCAGCCCGGGGATCCACTAGTCC<br>GCAGATAAATTGACGCACC      | To create pRP1454                                                                               | This study |
| oRP1473 | CGAATTGGAGCTCCACCGCGGTGGCGGCCGCTCTAGACG<br>TCGTAAGGCTGACACTGCAGAAG | To create pRP1449,<br>pRP1450 and<br>pRP1453                                                    | This study |
| oRP1474 | CGGGATCCAGATCTTTCACTCTTGGCTCGAGGGTACCTGT<br>CCGTTGGA               | To create pRP1453                                                                               | This study |
| oRP1475 | CGGGATCCAGATCTTTCACAATTGATCTTCATTTTTTATTT<br>GCCTCTG               | To create pRP1450                                                                               | This study |
| oRP1476 | CGGGATCCAGATCTTTCACATGGAATTAATCAGATAATA<br>CTTGATATT               | To create pRP1449                                                                               | This study |
| oRP1449 | GTAAAGGCATCAGAGGCAAATAAAAAATGAAGATCAATT<br>GTGAGGCGCGCCACTTCTAAA   | To create yRP2746<br>and yRP2748                                                                | This study |
| oRP1450 | TAATGCGGTCTCCAACGGACAGGTACCCTCGAGCCAAGA<br>GTGAGGCGCGCCACTTCTAAA   | To create yRP2745<br>and yRP2747                                                                | This study |
| oRP1451 | CATTTACAGTGTGTCTATAAAACGTATAACACTTATTCTT<br>GAATTCGAGCTCGTTTAAAC   | To create yRP2745,<br>yRP2746, yRP2747,<br>yRP2748, yRP2749,<br>yRP2751, yRP2752<br>and yRP2753 | This study |
| oRP1461 | TTCAGGGTCTAATGAATTATTAAGCATTTTGCATAGGAA<br>GTGAGGCGCGCCACTTCTAAA   | To create yRP2749                                                                               | This study |
| oRP1462 | GTAAAGGCATCAGAGGCAAATAAAAAATGAAGATCAATT<br>GCGGATCCCCGGGTAAATTAA   | To create yRP2753                                                                               | This study |
| oRP1463 | TTCAGGGTCTAATGAATTATTAAGCATTTTGCATAGGAA<br>GCGGATCCCCGGGTAAATTAA   | To create yRP2751                                                                               | This study |
| oRP1464 | TAATGCGGTCTCCAACGGACAGGTACCCTCGAGCCAAGA<br>GCGGATCCCCGGGTAAATTAA   | To create yRP2752                                                                               | This study |
| oRP1452 | GCCCAAGCCTCTTAATGATGG                                              | To verify integration<br>in the <i>DCP2</i> locus                                               | This study |
| oRP1453 | CGGTGATGTCAAATTGTGTTATGG                                           | To verify integration<br>in the <i>DCP2</i> locus                                               | This study |
| oRP1454 | ATGGGCTCGCGATAATGTGC                                               | To verify integration<br>with the kanMX<br>casette                                              | This study |

|         |                                                  |                                               |                                |
|---------|--------------------------------------------------|-----------------------------------------------|--------------------------------|
| oRP1455 | GCGATTCCGACTCGTCCAAC                             | To verify integration with the kanMX cassette | This study                     |
| oRP140  | ATATTGATTAGATCAGGAATTCC                          | Probe for <i>MFA2pG</i> mRNA                  | Caponigro and Parker, 1995     |
| oRP100  | GTCTAGCCGCGAGGAAGG                               | Probe for <i>SCR1</i> RNA                     | Caponigro <i>et al.</i> , 1993 |
| oRP1300 | GCTTTCTGTGCTTACCGATACGACCTTTACCGG                | Probe for <i>CYH2</i> mRNA                    | This study                     |
| oRP1456 | TTAGCAGGCTTTTCTCTCTTTGGTT                        | Probe for <i>YRA1</i> mRNA                    | This study                     |
| oRP1439 | CATCATTGAGTATTTCTACGCATTTG                       | Probe for <i>RPS28B</i> mRNA                  | This study                     |
| oRP831  | ACTTAGAGCTCACTAGTGCGGCCGCGTCGTAAGGCTGAC<br>ACTGC | To verify the sequence of <i>DCP2</i>         | T. Dunckley                    |
| oRP842  | GAGATTAATTCCGATGGGG                              | To verify the sequence of <i>DCP2</i>         | T. Dunckley                    |
| oRP843  | CATCATTAAAGAGGCTTGGGC                            | To verify the sequence of <i>DCP2</i>         | T. Dunckley                    |
| oRP844  | TTGTTGTTGATGATAACCCG                             | To verify the sequence of <i>DCP2</i>         | T. Dunckley                    |
| oRP845  | CCACATTGATAAGGGTCTC                              | To verify the sequence of <i>DCP2</i>         | T. Dunckley                    |
| oRP846  | CGATAAATCTTCATTCCGGAC                            | To verify the sequence of <i>DCP2</i>         | T. Dunckley                    |
| oRP864  | CCTTCTGTTGGTTGTGTTCTCC                           | To verify the sequence of <i>DCP2</i>         | T. Dunckley                    |
| oRP865  | CGGACAGGTACCCTCGAGCCAAGAGC                       | To verify the sequence of <i>DCP2</i>         | T. Dunckley                    |
| oRP1457 | CCATGATGAGACCCTTATCAATG                          | To verify the sequence of <i>DCP2</i>         | T. Dunckley                    |
| oRP1477 | GAAGGATTCCACAGTTGTTAATCCTCC                      | To verify the sequence of <i>DCP2</i>         | This study                     |
| oRP1478 | CCTTCACCCTCTCCACTGACAG                           | To verify sequence upstream of the GFP gene   | This study                     |

---

Caponigro, G., and R. Parker. 1995. Multiple functions for the poly(A)-binding protein in mRNA decapping and deadenylation in yeast. *Genes Dev.* 9:2421-2432

Caponigro, G., D. Muhlrads, and R. Parker. 1993. A small segment of the MAT alpha 1 transcript promotes mRNA decay in *Saccharomyces cerevisiae*: a stimulatory role for rare codons. *Mol. Cell Biol.* 13: 5141-5148

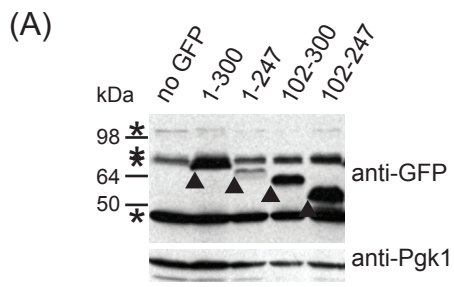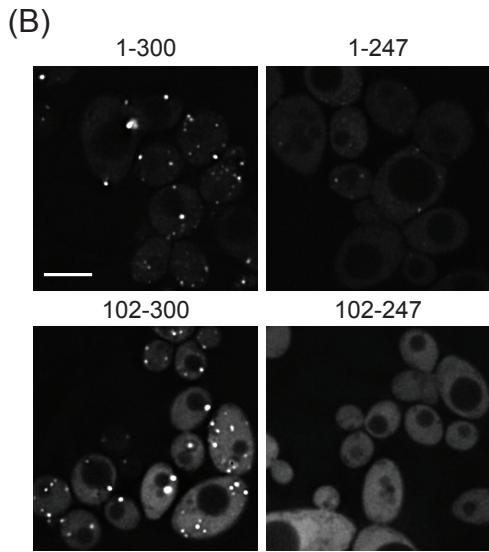

Figure S1



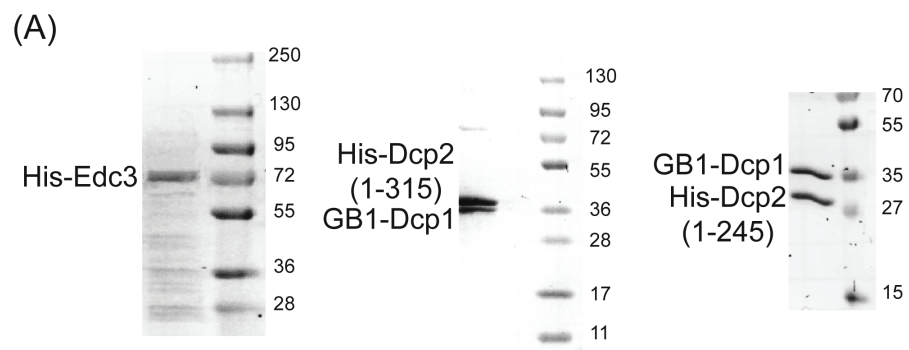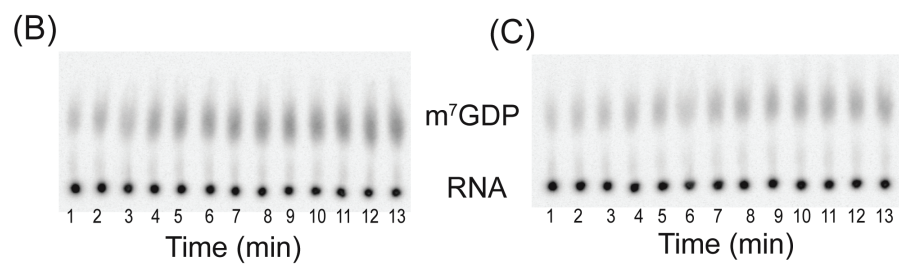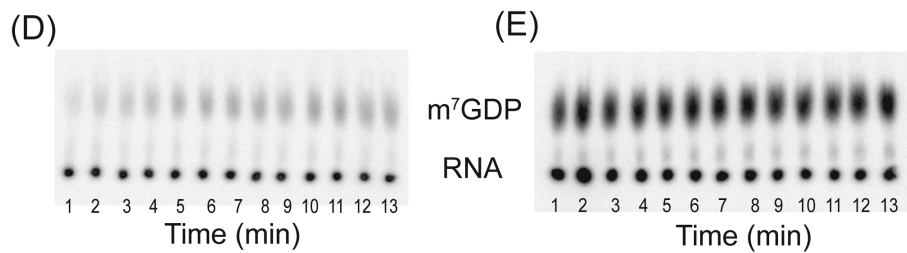

Figure S2

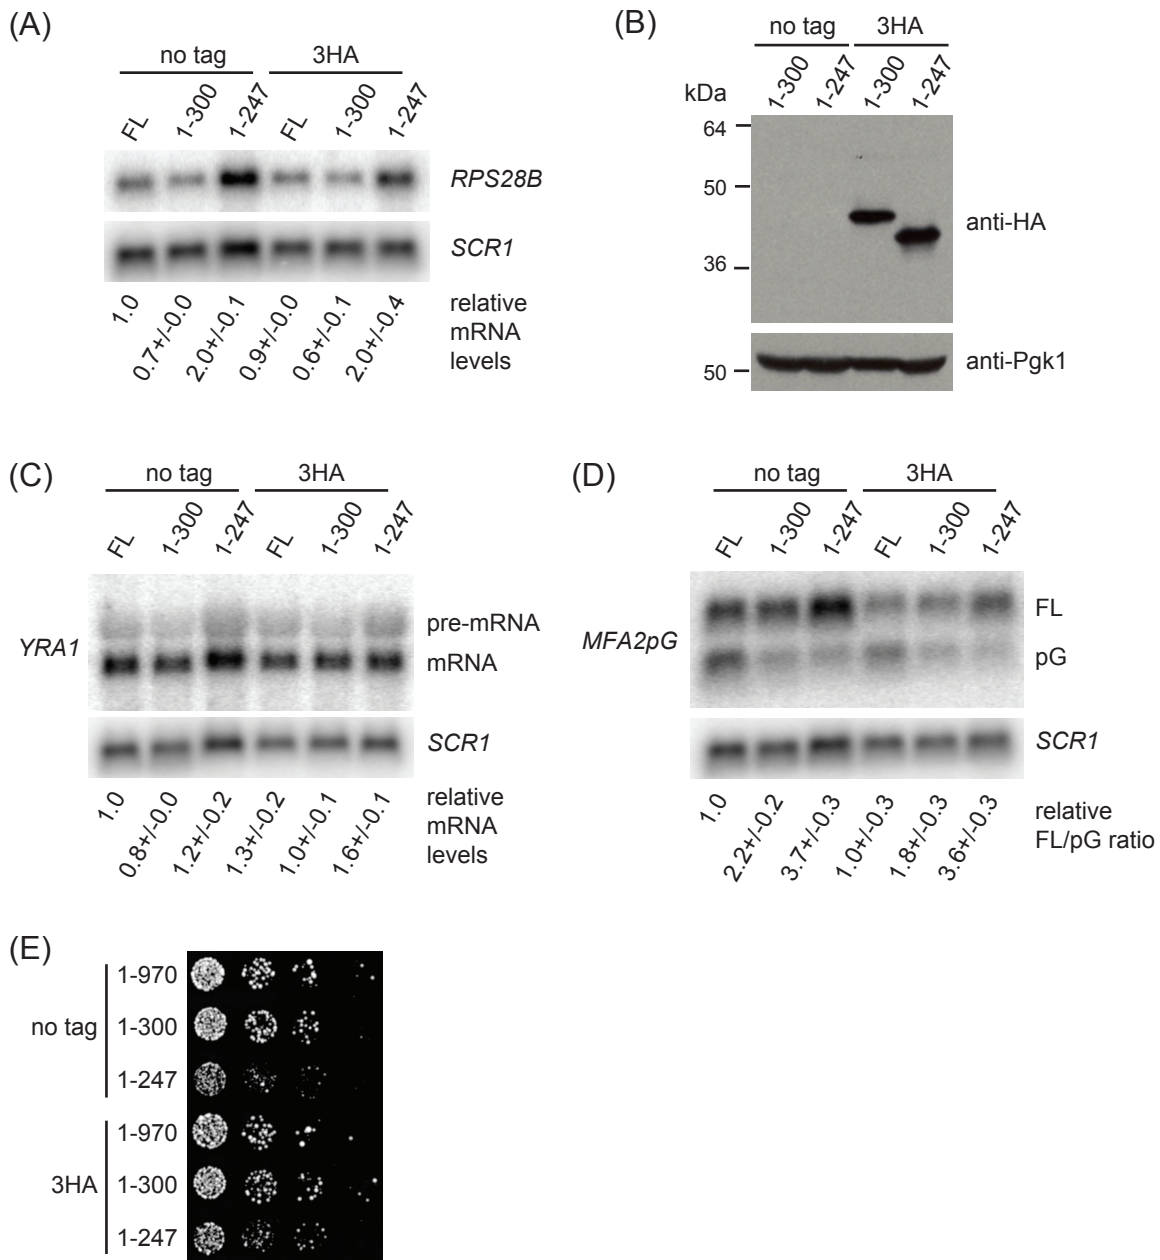

Figure S3

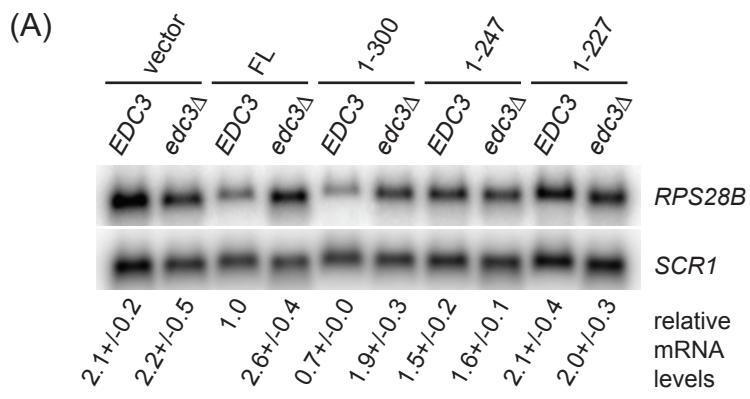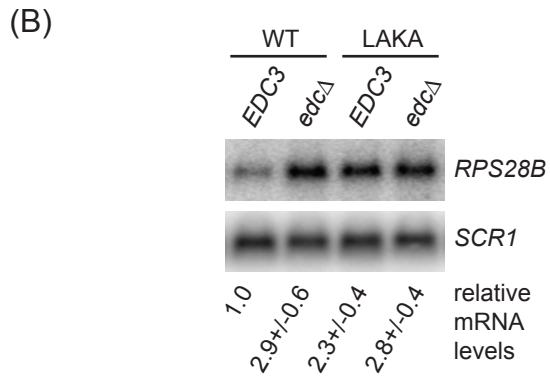

Figure S4

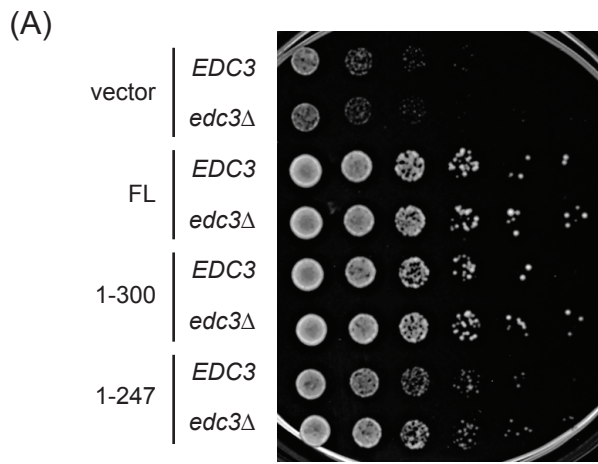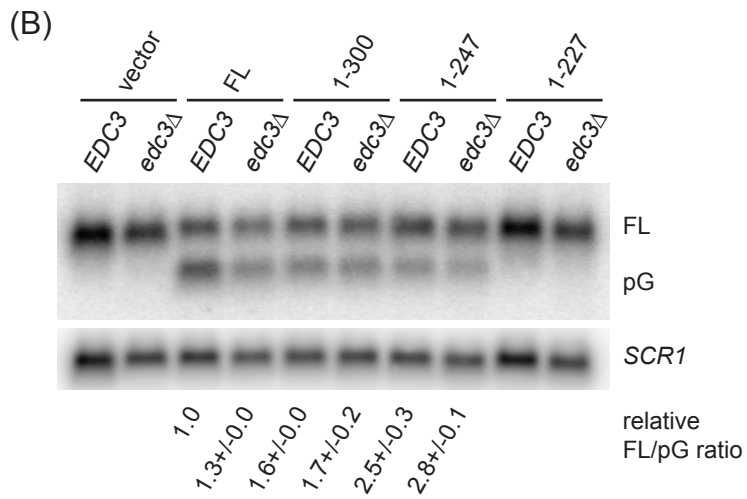

Figure S5

(A)

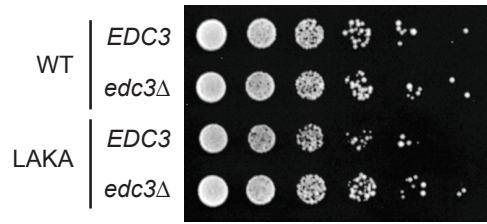

(B)

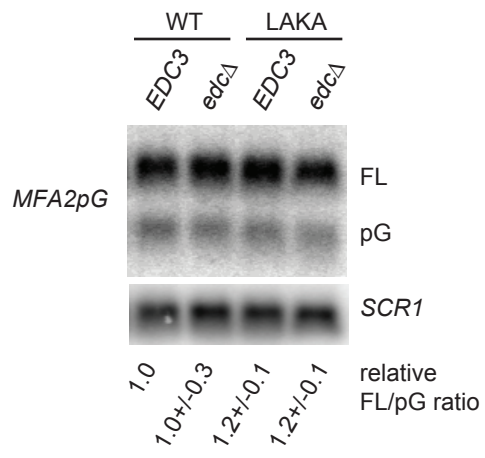

Figure S6

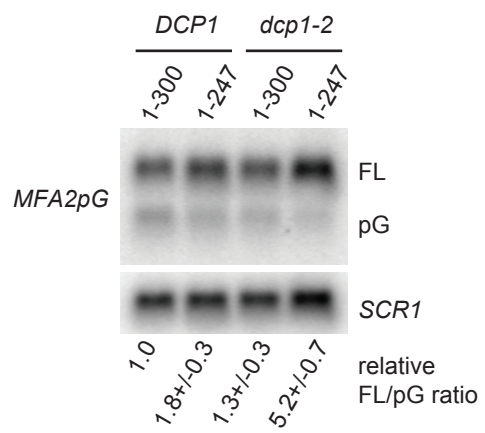

Figure S7
